# Supplementary material for: Fluorescent proteins and genetically encoded biosensors
Source: Royal Society of Chemistry journal article supplement (doi:10.1039/d2cs00419d), 2023-01-01
Supplement: d2cs00419d1.pdf [file d2cs00419d1.pdf]

## Supplementary Information

### Fluorescent Proteins and Genetically Encoded Biosensors

Minji Wang<sup>a</sup>, Yifan Da<sup>a</sup>, Yang Tian<sup>a\*</sup>,

*a. Shanghai Key Laboratory of Green Chemistry and Chemical Processes, School of Chemistry and Molecular Engineering, East China Normal University, No. 3663 Zhong Shan Road North, Shanghai, China, 200062.*

**Table S1.** List of some genetically encoded fluorescent sensors of which analytes are metal ions, neuron transmitters, amino acids and nucleotides.

| Name              | Type           | Ex/Em          | FP1             | FP2                 | $\Delta F/F$ or $\Delta FRET$ | Sensor                 | analyte                             | Kd                  | Ref               |
|-------------------|----------------|----------------|-----------------|---------------------|-------------------------------|------------------------|-------------------------------------|---------------------|-------------------|
| GCaMP2            | single         | 487/508        | EGFP            | -                   | 1.5                           | CaM<br>M13             | Ca <sup>2+</sup>                    | 146nM               | Ref <sup>1</sup>  |
| GCaMP6f           | single         | 496/513        | EGFP            | -                   | 19.0                          | CaM<br>M13             | Ca <sup>2+</sup>                    | 375nM               | Ref <sup>2</sup>  |
| RCaMP1h           | single         | 575/602        | mRuby           | -                   | 10.0                          | CaM<br>M13             | Ca <sup>2+</sup>                    | 1.9 $\mu$ M         | Ref <sup>3</sup>  |
| Camgarrow-1       | single         | 487/512        | EYFP            | -                   | 7.0                           | CaM                    | Ca <sup>2+</sup>                    | 7 $\mu$ M           | Ref <sup>4</sup>  |
| cameleon-2 yellow | FRET           | 433/535        | ECFP            | EYFP                | 1.5                           | CaM<br>M13             | Ca <sup>2+</sup>                    | 5.4 $\mu$ M         | Ref <sup>5</sup>  |
| GAF-CAM3-sfGFP    | single<br>/GAF | 648/676        | GAF-FP<br>1-172 | sfGFP               | 2.0                           | CaM<br>M13             | Ca <sup>2+</sup>                    | 433nM               | Ref <sup>6</sup>  |
| GINKO1            | single         | 502/514        | GFP             | -                   | 2.5                           | Kbp                    | K <sup>+</sup>                      | 420 $\mu$ M         | Ref <sup>7</sup>  |
| GEPII 1.0         | FRET           | 456/525        | CFP             | Venus               | -3.2                          | BON<br>LysM            | K <sup>+</sup>                      | 2.6mM               | Ref <sup>8</sup>  |
| ZifCY             | FRET           | 434/535        | ECFP            | EYFP                | 2.2                           | Zif268                 | Zn <sup>2+</sup>                    | 1.7 $\mu$ M         | Ref <sup>9</sup>  |
| ZinCh-9           | FRET           | (475/527)      | ECFP            | EYFP                | ~4                            | ECFP-<br>Y39H<br>S208C | Zn <sup>2+</sup>                    | 500nM<br>88 $\mu$ M | Ref <sup>10</sup> |
| BLZinCh-3         | BRET<br>FRET   | Auto/<br>(530) | Nanoluc         | Cerulean<br>Citrine | 0.5                           | H206/<br>C208          | Zn <sup>2+</sup>                    | 15.6pM              | Eef <sup>11</sup> |
| ZapCY1            | FRET           | 434/535        | ECFP            | EYFP                | 4.2                           | Zap1                   | Zn <sup>2+</sup>                    | 2.5pM               | Ref <sup>12</sup> |
| ZapCY2            | FRET           | 434/535        | ECFP            | EYFP                | 1.4                           | Zap1                   | Zn <sup>2+</sup>                    | 811pM               | Ref <sup>12</sup> |
| CALWY             | FRET           |                | CFP             | YFP                 | 0.15                          | AtoX1<br>WD4           | Zn <sup>2+</sup>                    | 0.2pM               | Ref <sup>13</sup> |
| eCALWY-C2M        | FRET           | 420/527        | Cerulean        | Citrine             |                               | AtoX1<br>WD4           | Cu <sup>+</sup><br>Zn <sup>2+</sup> | 96pM                | Ref <sup>14</sup> |

| Name                 | Type   | Ex/Em         | FP1    | FP2     | $\Delta F/F$ or<br>$\Delta FRET$ | Sensor                     | analyte                                                                                                                                                                                                                                      | Kd                                                                                            | Ref               |
|----------------------|--------|---------------|--------|---------|----------------------------------|----------------------------|----------------------------------------------------------------------------------------------------------------------------------------------------------------------------------------------------------------------------------------------|-----------------------------------------------------------------------------------------------|-------------------|
| Amt1-FRET            | FRET   | 433/527       | CFP    | YFP     | 0.16                             | Amt1<br>(Tran)             | Cu <sup>+</sup>                                                                                                                                                                                                                              | 2.5aM                                                                                         | Ref <sup>15</sup> |
| Ace1-FRET            | FRET   | 433/527       | CFP    | YFP     | <0.2                             | Ace1<br>(Tran)             | Cu <sup>+</sup>                                                                                                                                                                                                                              | 4.7aM                                                                                         | Ref <sup>16</sup> |
| GZnP1                | single | 488/513       | GFP    | -       | 2.6                              | Zap1                       | Zn <sup>2+</sup>                                                                                                                                                                                                                             | 58pM                                                                                          | Ref <sup>17</sup> |
| ZnGreen1             | single | (460/<br>500) | mTFP1  | -       | -26.3                            | Zap1                       | Zn <sup>2+</sup>                                                                                                                                                                                                                             | 633nM                                                                                         | Ref <sup>18</sup> |
| ZnGreen2             | single | (460/<br>500) | mTFP1  | -       | -8.7                             | Zn hook                    | Zn <sup>2+</sup>                                                                                                                                                                                                                             | 2.7 $\mu$ M                                                                                   | Ref <sup>18</sup> |
| ZnRed1               | single | (575/<br>600) | mApple | -       | 3.8                              | M13<br>CaM                 | Zn <sup>2+</sup>                                                                                                                                                                                                                             | 166nM/<br>20 $\mu$ M                                                                          | Ref <sup>18</sup> |
| (no name)            | BiFC   | (488)/510     | EGFP   | -       | (-0.5)                           | Amt1                       | Cu <sup>+</sup>                                                                                                                                                                                                                              | 0.46aM                                                                                        | Ref <sup>19</sup> |
| AR-18                | single | (550/590)     | RFP    | -       | -0.3                             | Amt1                       | Cu <sup>+</sup>                                                                                                                                                                                                                              |                                                                                               | Ref <sup>20</sup> |
| AR-41                | single | (550/590)     | RFP    | -       | -0.4                             | Amt1                       | Cu <sup>+</sup>                                                                                                                                                                                                                              |                                                                                               | Ref <sup>20</sup> |
| AR-59                | single | (550/590)     | RFP    | -       | -0.4                             | Amt1                       | Cu <sup>+</sup>                                                                                                                                                                                                                              |                                                                                               | Ref <sup>20</sup> |
| SenSil               | FRET   | (420/530)     | ECFP   | Venus   | (0.5)                            | CusF                       | Ag <sup>+</sup>                                                                                                                                                                                                                              | 5.1 $\mu$ M                                                                                   | Ref <sup>21</sup> |
| (HcRed)              | single | 592/645       | HcRed  | -       | $\sim$ -0.8                      | (HcRed)                    | Cu <sup>+</sup>                                                                                                                                                                                                                              | 3.6 $\mu$ M                                                                                   | Ref <sup>22</sup> |
| PbGFP                | single |               | GFP    | -       | -1.0                             | Cys145/<br>Cys205          | Pb <sup>2+</sup>                                                                                                                                                                                                                             | 700nM                                                                                         | Ref <sup>23</sup> |
| Met-Cad<br>1.57      | FRET   | 458/535       | ECFP   | Venus   | 0.8                              | CadR                       | Cd <sup>2+</sup>                                                                                                                                                                                                                             | 271nM                                                                                         | Ref <sup>24</sup> |
| H <sub>39</sub> GFP  | single | (488)/513     | EGFP   | -       | -1.0                             | 39 Histi-<br>dines         | Cu <sup>2+</sup>                                                                                                                                                                                                                             | 16.2nM                                                                                        | Ref <sup>25</sup> |
| LaMP1                | FRET   | (433/529)     | ECFP   | Citrine | $\sim$ 3.0                       | LanM                       | La <sup>3+</sup><br>Ce <sup>3+</sup><br>Pr <sup>3+</sup><br>Nd <sup>3+</sup><br>Sm <sup>3+</sup><br>Eu <sup>3+</sup><br>Gd <sup>3+</sup><br>Tb <sup>3+</sup><br>Dy <sup>3+</sup><br>Ho <sup>3+</sup><br>Er <sup>3+</sup><br>Yb <sup>3+</sup> | 9.4pM<br>16pM<br>13pM<br>12pM<br>12pM<br>16pM<br>10pM<br>18pM<br>26pM<br>29pM<br>36pM<br>44pM | Ref <sup>26</sup> |
| SenALiB              | FRET   | (420/530)     | ECFP   | Venus   | (0.15)                           | ArsR                       | As <sup>III</sup>                                                                                                                                                                                                                            | 676nM                                                                                         | Ref <sup>27</sup> |
| dLight1.1            | single | (488)/513     | EGFP   | -       | 2.3                              | DRD1                       | Dopamine                                                                                                                                                                                                                                     | 330nM                                                                                         | Ref <sup>28</sup> |
| GRAB <sub>NE1m</sub> | single |               | EGFP   | -       | 2.3                              | $\alpha$ 2AR <sub>NE</sub> | Norepine-<br>phrine                                                                                                                                                                                                                          | 930nM<br>(EC50)                                                                               | Ref <sup>29</sup> |
| GRAB <sub>DA1m</sub> | single |               | EGFP   | -       | 0.9                              | D2R <sub>DA</sub>          | Dopamine                                                                                                                                                                                                                                     | 97nM<br>(EC50)                                                                                | Ref <sup>30</sup> |
| GRAB <sub>SHT</sub>  | single |               | EGFP   | -       | 2.5                              | 5-HT2C                     | 5-HT                                                                                                                                                                                                                                         | 22nM                                                                                          | Ref <sup>31</sup> |

| Name                              | Type   | Ex/Em           | FP1            | FP2     | $\Delta F/F$ or<br>$\Delta FRET$ | Sensor                                               | analyte                          | Kd                    | Ref               |
|-----------------------------------|--------|-----------------|----------------|---------|----------------------------------|------------------------------------------------------|----------------------------------|-----------------------|-------------------|
| GACH2.0                           | single |                 | EGFP           | -       | 0.94                             | M3R <sub>ACh</sub>                                   | Acetyl-<br>choline               | (EC50)<br>1.9 $\mu$ M | Ref <sup>32</sup> |
| OxLight1                          | single |                 | EGFP           | -       | 1.3                              | OX2R                                                 | Orexin-A                         | (EC50)<br>47nM        | Ref <sup>33</sup> |
| MBP165-<br>cpGFP                  | single | (485/515)       | EGFP           | -       | 2.5                              | MBP                                                  | maltose                          | (EC50)<br>3 $\mu$ M   | Ref <sup>34</sup> |
| FLIPglu-<br>600 $\mu$ $\Delta$ 13 | FRET   | 433/(525)       | ECFP           | EYFP    | -0.28                            | MglB                                                 | glucose                          | (0.6 $\mu$ M)         | Ref <sup>35</sup> |
| Super<br>GluSnFR                  | FRET   | (420/526)       | CFP            | Citrine | -0.44                            | GltI                                                 | Glutamate                        | 2.5 $\mu$ M           | Ref <sup>36</sup> |
| SF-<br>iGluSnFR                   | single |                 | sfGFP          | -       | 0.3                              | GltI                                                 | Glutamate                        |                       | Ref <sup>37</sup> |
| iGAGA-<br>SnFR                    | single |                 | sfGFP          | -       | 2.5                              | Pf622                                                | $\gamma$ -amino-<br>butyric acid | 9 $\mu$ M             | Ref <sup>38</sup> |
| FLIP-<br>Leu50                    | FRET   | 430/535         | CFP            | YFP     | 0.3                              | LivK                                                 | leucine                          | 50 $\mu$ M            | Ref <sup>39</sup> |
| FLIP-M                            | FRET   | 430/535         | CFP            | YFP     | 0.2                              | MetN                                                 | methionine                       | 203 $\mu$ M           | Ref <sup>40</sup> |
| FLIPK                             | FRET   | 430/535         | CFP            | YFP     | 0.2                              | LAO                                                  | lysine                           | 97 $\mu$ M            | Ref <sup>41</sup> |
| GBOS                              | FRET   | (435/535)       | CFP            | YFP     | 0.3                              | ProX                                                 | Glycine-<br>betaine              | 400 $\mu$ M           | Ref <sup>42</sup> |
| GRAB <sub>ATP</sub><br>1.0        | single |                 | EGFP           | -       | 5.0 –<br>10.0                    | hp2Y1                                                | ATP                              | 6.7 $\mu$ M           | Ref <sup>43</sup> |
| iATPSnFR                          | single | (435/530)       | sfGFP          | -       | 2.4                              | PS3 F <sub>0</sub> F <sub>1</sub><br>ATP<br>Synthase | ATP                              | 120 $\mu$ M           | Ref <sup>44</sup> |
| NS2<br>C3L194E                    | single | 421,<br>500/518 | YFP            | -       | 9.0                              | T-Rex                                                | NADH                             | 3.7 $\mu$ M           | Ref <sup>45</sup> |
| NS2<br>C8N120E                    | single | 421,<br>500/519 | YFP            | -       | -0.66                            | T-Rex                                                | NADH                             | 40nM                  | Ref <sup>45</sup> |
| Peredox                           | single | 400/510         | T-<br>Sapphire | -       | 1.5                              | T-Rex                                                | NADH                             | <5nM                  | Ref <sup>46</sup> |
| (no name)                         | single | (500/520)       | Venus          | -       | ~-0.5                            | (Bacterial<br>DNA<br>ligase)                         | NAD <sup>+</sup>                 | 65 $\mu$ M            | Ref <sup>47</sup> |

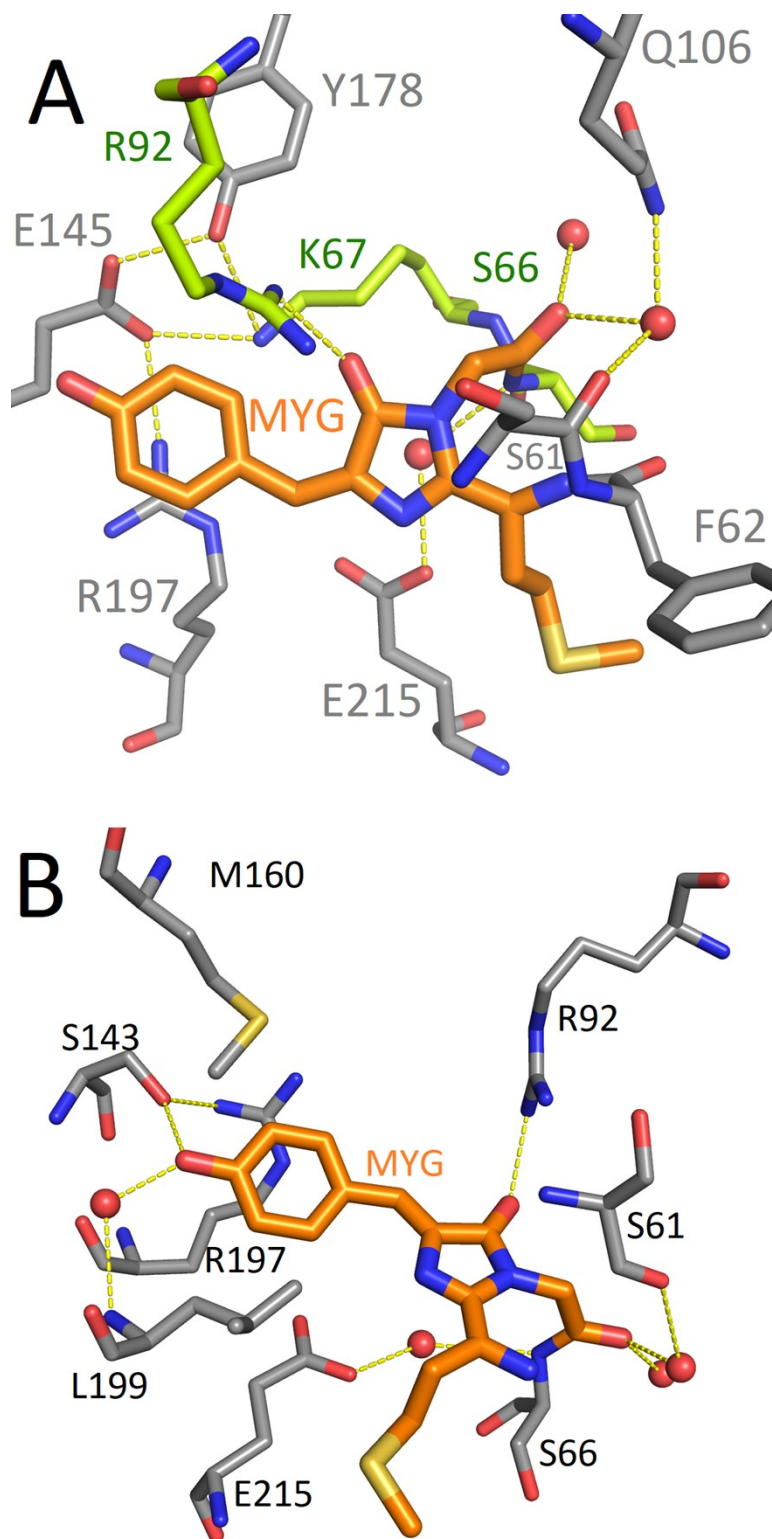

**Fig. S1.** Sticks representation showing the micro-environment of the fluorophore of (A) mKate under pH 2.0 (the trans- form, PDB: 3BX9) and (B) mKate under pH 7.0 (the cis- form, PDB: 3BXB). The fluorophore and the surrounding residues are shown as sticks whilst the water molecules are shown as red spheres. Important hydrogen bonds are shown as dash lines.

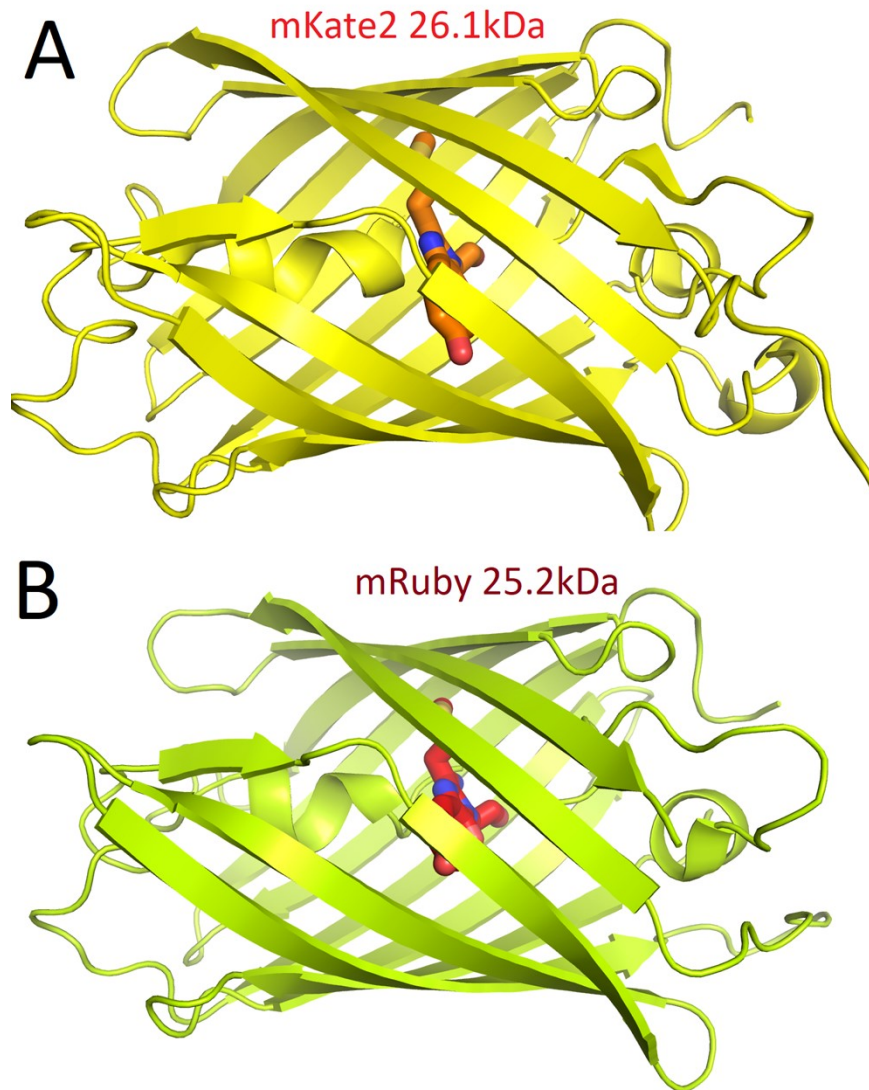

**Fig. S2.** The overall structure of mKate2 (A, an eqFP578 derivative, PDB: 3BX9) and mRuby (B, an eqFP611 derivative, PDB: 3U0L) in cartoon representation. The  $\alpha$ -helices are shown as helices whilst  $\beta$ -sheets are shown as arrows.

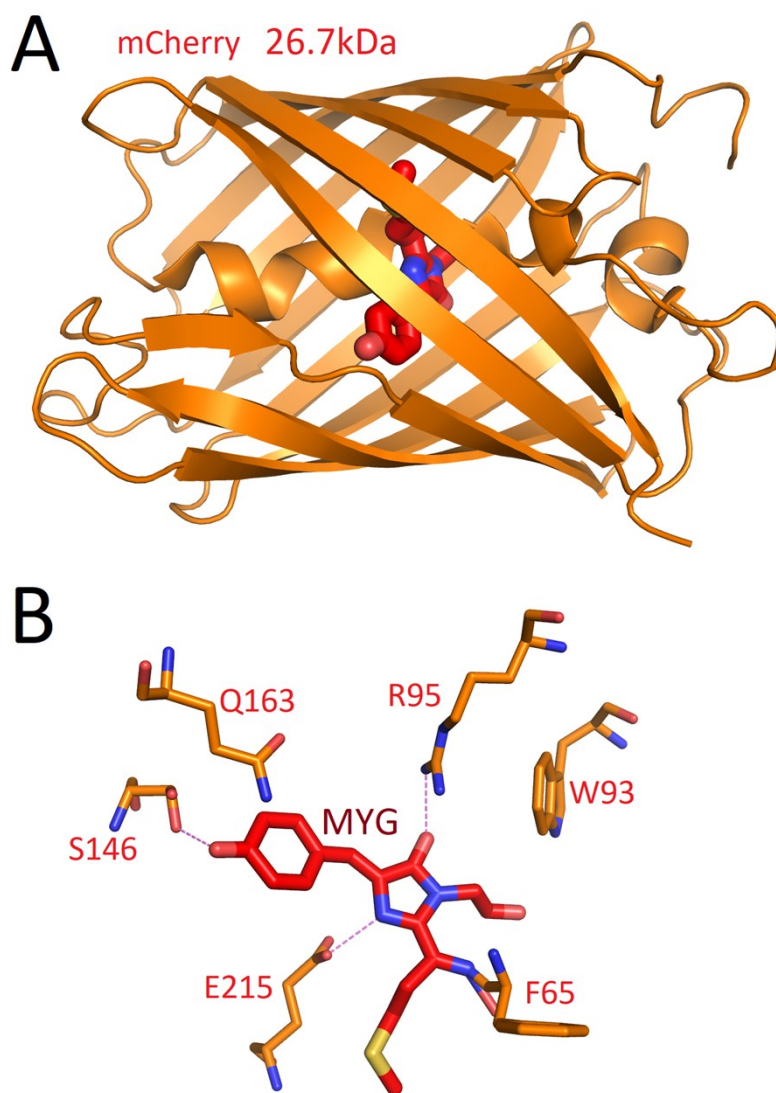

**Fig. S3.** The overall structure in cartoon representation (A) and the micro-environment of the fluorophore (B) in the DsRed-derivative fluorescent protein, mCherry. (PDB: 2H5Q) In (A),  $\alpha$ -helices are shown as helices whilst  $\beta$ -sheets are shown as arrows. In (B), the fluorophore and surrounding residues are shown as sticks. Important hydrogen bonds are shown as dash lines.

1. Y. N. Tallini, M. Ohkura, B.-R. Choi, G. Ji, K. Imoto, R. Doran, J. Lee, P. Plan, J. Wilson, H.-B. Xin, A. Sanbe, J. Gulick, J. Mathai, J. Robbins, G. Salama, J. Nakai and M. I. Kotlikoff, *Proceedings of the National Academy of Sciences*, 2006, **103**, 4753-4758.
2. T. W. Chen, T. J. Wardill, Y. Sun, S. R. Pulver, S. L. Renninger, A. Baohan, E. R. Schreiter, R. A. Kerr, M. B. Orger, V. Jayaraman, L. L. Looger, K. Svoboda and D. S. Kim, *Nature*, 2013, **499**, 295-300.
3. J. Akerboom, N. Carreras Calderón, L. Tian, S. Wabnig, M. Prigge, J. Tolö, A. Gordus, M. B. Orger, K. E. Severi, J. J. Macklin, R. Patel, S. R. Pulver, T. J. Wardill, E. Fischer, C. Schüler, T. W. Chen, K. S. Sarkisyan, J. S. Marvin, C. I. Bargmann, D. S. Kim, S. Kügler, L. Lagnado, P. Hegemann, A. Gottschalk, E. R. Schreiter and L. L. Looger, *Front Mol Neurosci*, 2013, **6**, 2.

4. G. S. Baird, D. A. Zacharias and R. Y. Tsien, *Proc Natl Acad Sci US A*, 1999, **96**, 11241-11246.
5. A. Miyawaki, J. Llopis, R. Heim, J. M. McCaffery, J. A. Adams, M. Ikura and R. Y. Tsien, *Nature*, 1997, **388**, 882-887.
6. O. M. Subach and F. V. Subach, *Int J Mol Sci*, 2020, **21**.
7. Y. Shen, S. Y. Wu, V. Rancic, A. Aggarwal, Y. Qian, S. I. Miyashita, K. Ballanyi, R. E. Campbell and M. Dong, *Commun Biol*, 2019, **2**, 18.
8. H. Bischof, M. Rehberg, S. Stryeck, K. Artinger, E. Eroglu, M. Waldeck-Weiermair, B. Gottschalk, R. Rost, A. T. Deak, T. Niedrist, N. Vujic, H. Lindermuth, R. Prassl, B. Pelzmann, K. Groschner, D. Kratky, K. Eller, A. R. Rosenkranz, T. Madl, N. Plesnila, W. F. Graier and R. Malli, *Nat Commun*, 2017, **8**, 1422.
9. P. J. Dittmer, J. G. Miranda, J. A. Gorski and A. E. Palmer, *J Biol Chem*, 2009, **284**, 16289-16297.
10. T. H. Evers, M. A. Appelhof, P. T. de Graaf-Heuvelmans, E. W. Meijer and M. Merckx, *J Mol Biol*, 2007, **374**, 411-425.
11. S. J. Aper, P. Dierickx and M. Merckx, *ACS Chem Biol*, 2016, **11**, 2854-2864.
12. Y. Qin, P. J. Dittmer, J. G. Park, K. B. Jansen and A. E. Palmer, *Proceedings of the National Academy of Sciences*, 2011, **108**, 7351-7356.
13. E. M. van Dongen, T. H. Evers, L. M. Dekkers, E. W. Meijer, L. W. Klomp and M. Merckx, *J Am Chem Soc*, 2007, **129**, 3494-3495.
14. M. S. Koay, B. M. Janssen and M. Merckx, *Dalton Trans*, 2013, **42**, 3230-3232.
15. S. V. Wegner, H. Arslan, M. Sunbul, J. Yin and C. He, *J Am Chem Soc*, 2010, **132**, 2567-2569.
16. S. V. Wegner, F. Sun, N. Hernandez and C. He, *Chem Commun (Camb)*, 2011, **47**, 2571-2573.
17. Y. Qin, D. W. Sammond, E. Braselmann, M. C. Carpenter and A. E. Palmer, *ACS Chem Biol*, 2016, **11**, 2744-2751.
18. Z. Chen and H. W. Ai, *Anal Chem*, 2016, **88**, 9029-9036.
19. J. Liang, M. Qin, R. Xu, X. Gao, Y. Shen, Q. Xu, Y. Cao and W. Wang, *Chem Commun (Camb)*, 2012, **48**, 3890-3892.
20. J. Liang, L. Guo, Y. Ding, L. Xia, Y. Shen, M. Qin, Q. Xu, Y. Cao and W. Wang, *Biochem Biophys Res Commun*, 2014, **443**, 894-898.
21. N. Agrawal, N. Soleja, R. Bano, R. Nazir, T. O. Siddiqi and M. Mohsin, *ACS Omega*, 2021, **6**, 14164-14173.
22. Y. Rahimi, S. Shrestha, T. Banerjee and S. K. Deo, *Anal Biochem*, 2007, **370**, 60-67.
23. S. P. Nadarajan, Y. Ravikumar, K. Deepankumar, C. S. Lee and H. Yun, *Chem Commun (Camb)*, 2014, **50**, 15979-15982.
24. T. Y. Chiu, P. H. Chen, C. L. Chang and D. M. Yang, *PLoS One*, 2013, **8**, e65853.
25. C. Lei, Z. Wang, Z. Nie, H. Deng, H. Hu, Y. Huang and S. Yao, *Anal Chem*, 2015, **87**, 1974-1980.
26. J. A. Mattocks, J. V. Ho and J. A. Cotruvo, Jr., *J Am Chem Soc*, 2019, **141**, 2857-2861.
27. N. Soleja, O. Manzoor, P. Khan and M. Mohsin, *Sci Rep*, 2019, **9**, 11240.
28. T. Patriarchi, J. R. Cho, K. Merten, M. W. Howe, A. Marley, W. H. Xiong, R. W. Folk, G. J. Broussard, R. Liang, M. J. Jang, H. Zhong, D. Dombeck, M. von Zastrow, A. Nimmerjahn, V. Gradinaru, J. T. Williams and L. Tian, *Science*, 2018, **360**.
29. J. Feng, C. Zhang, J. E. Lischinsky, M. Jing, J. Zhou, H. Wang, Y. Zhang, A. Dong, Z. Wu, H. Wu, W. Chen, P. Zhang, J. Zou, S. A. Hires, J. J. Zhu, G. Cui, D. Lin, J. Du and Y. Li, *Neuron*,

- 2019, **102**, 745-761.e748.
30. F. Sun, J. Zeng, M. Jing, J. Zhou, J. Feng, S. F. Owen, Y. Luo, F. Li, H. Wang, T. Yamaguchi, Z. Yong, Y. Gao, W. Peng, L. Wang, S. Zhang, J. Du, D. Lin, M. Xu, A. C. Kreitzer, G. Cui and Y. Li, *Cell*, 2018, **174**, 481-496.e419.
  31. J. Wan, W. Peng, X. Li, T. Qian, K. Song, J. Zeng, F. Deng, S. Hao, J. Feng, P. Zhang, Y. Zhang, J. Zou, S. Pan, M. Shin, B. J. Venton, J. J. Zhu, M. Jing, M. Xu and Y. Li, *Nat Neurosci*, 2021, **24**, 746-752.
  32. M. Jing, P. Zhang, G. Wang, J. Feng, L. Mesik, J. Zeng, H. Jiang, S. Wang, J. C. Looby, N. A. Guagliardo, L. W. Langma, J. Lu, Y. Zuo, D. A. Talmage, L. W. Role, P. Q. Barrett, L. I. Zhang, M. Luo, Y. Song, J. J. Zhu and Y. Li, *Nat Biotechnol*, 2018, **36**, 726-737.
  33. L. Duffet, S. Kosar, M. Panniello, B. Viberti, E. Bracey, A. D. Zych, A. Radoux-Mergault, X. Zhou, J. Dernic, L. Ravotto, Y. C. Tsai, M. Figueiredo, S. K. Tyagarajan, B. Weber, M. Stoeber, N. Gogolla, M. H. Schmidt, A. R. Adamantidis, T. Fellin, D. Burdakov and T. Patriarchi, *Nat Methods*, 2022, **19**, 231-241.
  34. J. S. Marvin, E. R. Schreiter, I. M. Echevarría and L. L. Looger, *Proteins*, 2011, **79**, 3025-3036.
  35. K. Deuschle, S. Okumoto, M. Fehr, L. L. Looger, L. Kozhukh and W. B. Frommer, *Protein Sci*, 2005, **14**, 2304-2314.
  36. S. A. Hires, Y. Zhu and R. Y. Tsien, *Proc Natl Acad Sci U S A*, 2008, **105**, 4411-4416.
  37. J. S. Marvin, B. Scholl, D. E. Wilson, K. Podgorski, A. Kazemipour, J. A. Müller, S. Schoch, F. J. U. Quiroz, N. Rebola, H. Bao, J. P. Little, A. N. Tkachuk, E. Cai, A. W. Hantman, S. S. Wang, V. J. DePiero, B. G. Borghuis, E. R. Chapman, D. Dietrich, D. A. DiGregorio, D. Fitzpatrick and L. L. Looger, *Nat Methods*, 2018, **15**, 936-939.
  38. J. S. Marvin, Y. Shimoda, V. Magloire, M. Leite, T. Kawashima, T. P. Jensen, I. Kolb, E. L. Knott, O. Novak, K. Podgorski, N. J. Leidenheimer, D. A. Rusakov, M. B. Ahrens, D. M. Kullmann and L. L. Looger, *Nat Methods*, 2019, **16**, 763-770.
  39. M. Mohsin, M. Z. Abdin, L. Nischal, H. Kardam and A. Ahmad, *Biosens Bioelectron*, 2013, **50**, 72-77.
  40. M. Mohsin and A. Ahmad, *Biosens Bioelectron*, 2014, **59**, 358-364.
  41. S. Ameen, M. Ahmad, M. Mohsin, M. I. Qureshi, M. M. Ibrahim, M. Z. Abdin and A. Ahmad, *J Nanobiotechnology*, 2016, **14**, 49.
  42. M. Ahmad, S. Ameen, T. O. Siddiqi, P. Khan and A. Ahmad, *Biosens Bioelectron*, 2016, **86**, 169-175.
  43. Z. Wu, K. He, Y. Chen, H. Li, S. Pan, B. Li, T. Liu, F. Xi, F. Deng, H. Wang, J. Du, M. Jing and Y. Li, *Neuron*, 2022, **110**, 770-782.e775.
  44. M. A. Lobas, R. Tao, J. Nagai, M. T. Kronschläger, P. M. Borden, J. S. Marvin, L. L. Looger and B. S. Khakh, *Nat Commun*, 2019, **10**, 711.
  45. Y. Zhao, J. Jin, Q. Hu, H. M. Zhou, J. Yi, Z. Yu, L. Xu, X. Wang, Y. Yang and J. Loscalzo, *Cell Metab*, 2011, **14**, 555-566.
  46. Y. P. Hung, J. G. Albeck, M. Tantama and G. Yellen, *Cell Metab*, 2011, **14**, 545-554.
  47. X. A. Cambronne, M. L. Stewart, D. Kim, A. M. Jones-Brunette, R. K. Morgan, D. L. Farrens, M. S. Cohen and R. H. Goodman, *Science*, 2016, **352**, 1474-1477.
  48. R. Ando, H. Mizuno and A. Miyawaki, *Science*, 2004, **306**, 1370-1373.
